# Supplementary material for: Waist Circumference and All-Cause Mortality Independent of Body Mass Index in Korean Population from the National Health Insurance Health Checkup 2009–2015
Source: PubMed Central journal article supplement (PMC6352259; doi:10.3390/jcm8010072), 2019-01-10
Supplement: jcm-08-00072-s001.pdf [file jcm-08-00072-s001.pdf]

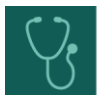

Supplement figure 1. Smoothed hazard ratio for waist circumference

- 1) Before adjusting for body mass index

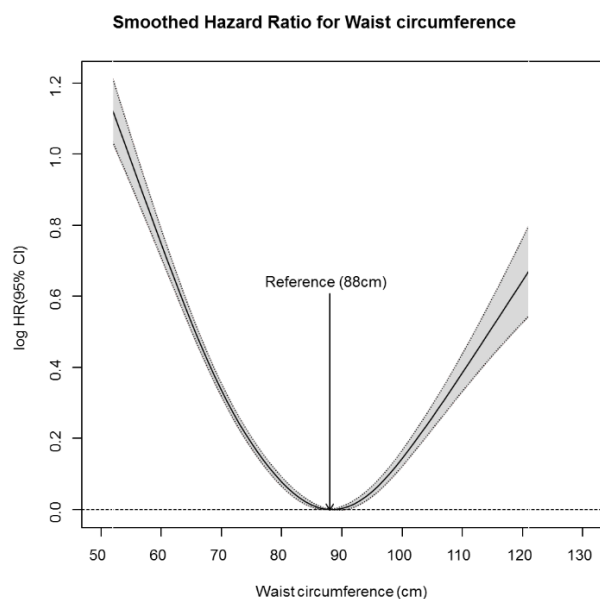

Adjusted for age, sex, smoking, drinking, exercise, and income

HR; hazards ratio, and C.I.; confidence interval

- 2) After adjusting for body mass index

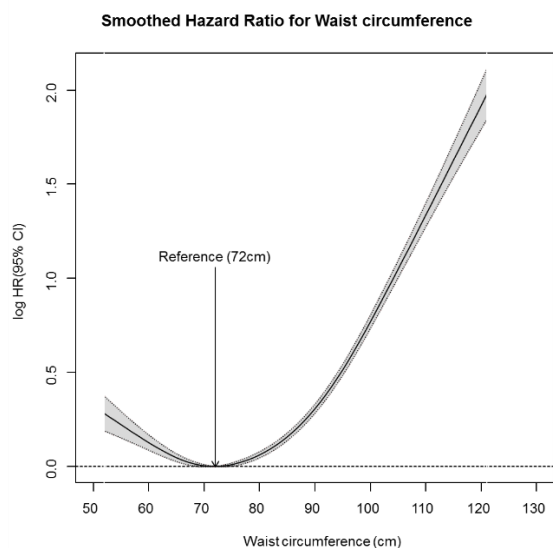

Adjusted for age, sex, smoking, drinking, exercise, income, and body mass index

HR; hazards ratio, and C.I.; confidence interval

Supplement table 1. Age and sex standardized incidence rate based on Korea 2010 Census

| WC group | N       | Death  | Duration   | aIR* | Lower | Upper |
|----------|---------|--------|------------|------|-------|-------|
| 1        | 8672967 | 149733 | 46394946.4 | 5.10 | 5.07  | 5.13  |
| 2        | 5362342 | 111307 | 29089043.6 | 4.03 | 4.00  | 4.05  |
| 3        | 4538812 | 106771 | 24633745.2 | 3.79 | 3.76  | 3.81  |
| 4        | 2714222 | 72606  | 14677575.8 | 3.75 | 3.72  | 3.78  |
| 5        | 1253456 | 37763  | 6731707.3  | 3.97 | 3.93  | 4.02  |
| 6        | 722079  | 24276  | 3814427.1  | 4.62 | 4.55  | 4.68  |

\* Age and sex standardized incidence rate
